# Supplementary material
Source: Springer Nature journal article supplement (https://www.springermedizin.de/resource/supplementary/12876_2010_564_MOESM5_ESM.pdf/9437258)
Supplement: MOESM5 [file 9437258]

Reported cases: **1593**

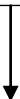

Completed cases: **1353**

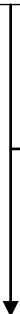

Misreported/double reported cases: **153**

Children with at least one event of definite  
IS ( $0 < a < 15$ ): **1200**  
 $0 < a < 2$ : 647

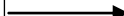

Children at least one event of definite  
IS in random sample for 31 hospitals  
( $0 < a < 15$ ): **226**  
 $0 < a < 2$ : 129
